# Supplementary material for: The Discovery of Actinospene, a New Polyene Macrolide with Broad Activity against Plant Fungal Pathogens and Pathogenic Yeasts
Source: MDPI journal article supplement (doi:10.3390/molecules26227020), 2021-11-20
Supplement: s1 [file s1]

# **The discovery of actinospene, a new polyene macrolide with broad activity against plant fungal pathogens and pathogenic yeasts**

**Ying Tang <sup>1</sup>, Cuiyang Zhang <sup>1</sup>, Tianqi Cui <sup>2</sup>, Ping Lei <sup>1</sup>, Zhaohui Guo <sup>1,\*</sup>, Hailong Wang <sup>2,\*</sup> and Qingshu Liu <sup>1,\*</sup>**

<sup>1</sup> Hunan Institute of Microbiology, Changsha, 410009, Hunan, People's Republic of China

<sup>2</sup> State Key Laboratory of Microbial Technology, Institute of Microbial Technology, Helmholtz International Lab for Anti-infectives, Shandong University–Helmholtz Institute of Biotechnology, Shandong University, Qingdao, Shandong, People's Republic of China

\* Correspondence: 1214837569@qq.com (Z.G.); wanghailong@sdu.edu.cn (H.W.); volcanoya@126.com (Q.L.)

**Table S1.** Gene annotation for the cryptic Actn BGC based on antiSMASH 6.0 prediction.

| ORF    | nt (bp) | Proposed function (domain organization)                                                     | Accession number |
|--------|---------|---------------------------------------------------------------------------------------------|------------------|
| ActnS2 | 7474    | TI PKS, KS-AT-DH-KR-PP-KS-AT                                                                | WP_035287518.1   |
| ActnS0 | 8148    | TI PKS, KS-AT-PP-KS-AT-DH-KR-PP                                                             | WP_035287521.1   |
| ActnK  | 1431    | Glycosyltransferase family 1 protein                                                        | WP_052021789.1   |
| ActnC  | 1059    | DegT/DnrJ/EryC1/StrS family aminotransferase                                                | WP_035287523.1   |
| ActnG  | 1179    | Cytochrome P450                                                                             | WP_035287525.1   |
| ActnF  | 192     | Ferredoxin                                                                                  | WP_035287527.1   |
| ActnS4 | 6012    | TI PKS, KS-AT-DH-KR-PP-TE                                                                   | WP_035287529.1   |
| ActnS1 | 5385    | TI PKS, KS-AT-DH-KR-PP                                                                      | WP_052021790.1   |
| ActnS3 | 27906   | TI PKS, KS-AT-DH-KR-PP-KS-AT<br>-KR-PP-KS-AT-KR-PP-KS-AT-KR-PP-KS-AT-<br>KR-PP-KS-AT- KR-PP | WP_035287531.1   |
| ActnA  | 1839    | ABC transporter ATP-binding protein                                                         | WP_035287533.1   |
| ActnB  | 1737    | ABC transporter ATP-binding protein                                                         | WP_084176275.1   |
| ActnD3 | 1176    | Cytochrome P450                                                                             | WP_152552277.1   |
| ActnD2 | 1182    | Cytochrome P450                                                                             | WP_035287537.1   |
| ActnU  | 1740    | Acyl-CoA ligase                                                                             | WP_035287549.1   |
| ActnV  | 2202    | Acyl-CoA dehydrogenase                                                                      | WP_035287553.1   |
| ActnR1 | 693     | TetR/AcrR family transcriptional regulator                                                  | WP_035287558.1   |
| ActnD1 | 1206    | Cytochrome P450                                                                             | WP_035287568.1   |
| ActnR2 | 603     | TetR/AcrR family transcriptional regulator                                                  | WP_052021798.1   |
| ActnR3 | 1174    | Sensor histidine kinase                                                                     | WP_152552284.1   |
| ActnJ  | 1032    | GDP-mannose 4,6-dehydratase                                                                 | WP_035288993.1   |

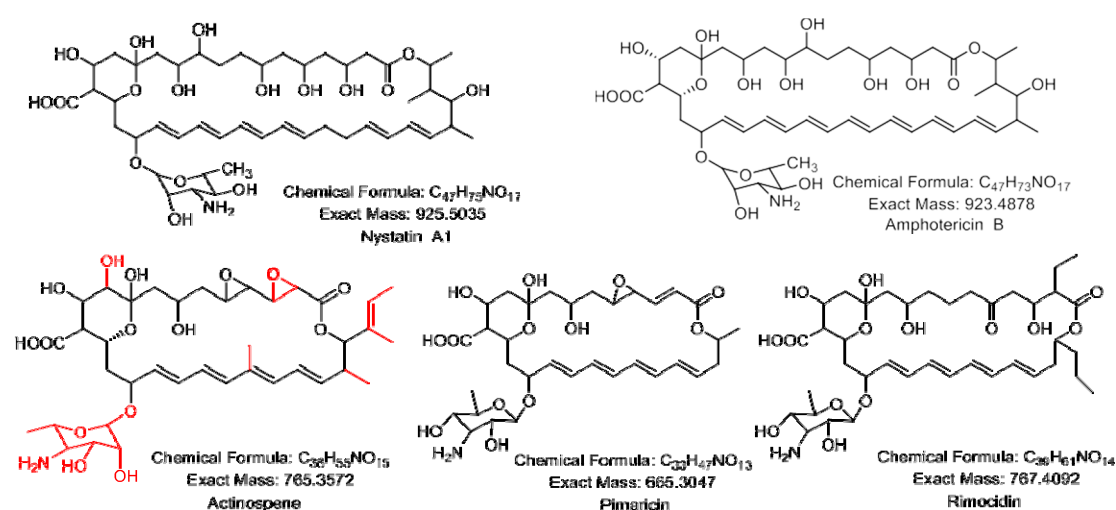

**Figure S1.** The planar structures of actinospene and previously reported polyene antifungal antibiotics. Differences between actinospene and pimaricin are indicated in red.

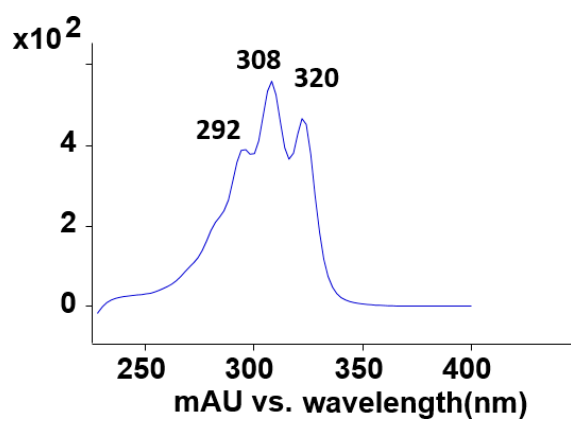

**Figure S2.** UV/Vis spectrum of actinospene (1).

UV/Vis spectrum of the main HPLC peak at *t<sub>R</sub>* 5.27 min showing absorption maxima at 292, 308, and 320 nm.

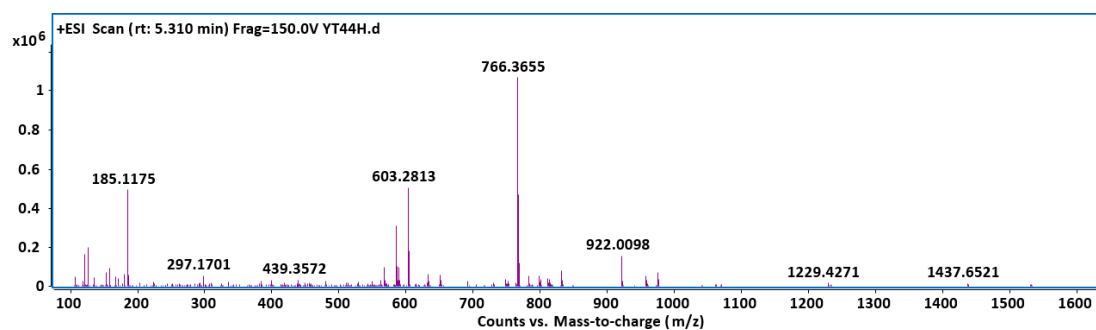

**Figure S3.** High resolution mass spectrum of actinospene (1).

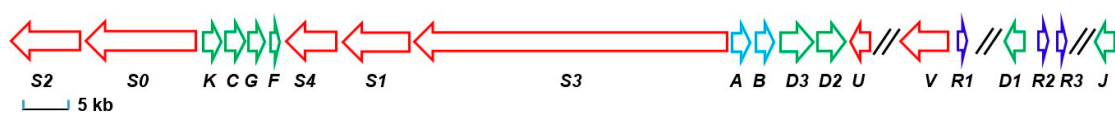

**Figure S4.** Schematic representation for the cryptic Actn BGC.

|                |                                                     |                                  |
|----------------|-----------------------------------------------------|----------------------------------|
| ActnS0KS0      | AESHEYGPGLLNA-DGAEGLHHTGTAAGVTSGRIAYALGLRGPVLTVDTA  | SSGSLVALHL                       |
| AmphAKS0       | TNGQDYATVTNASREDLTGHALTGLSPSIASGRLAYFLGLECPAVTLDTA  | SSSSLVALHY                       |
| NysAKS0        | ASGQDYAAVTHASPDLDLGHALTGLAPGVASGRLAYVFLGLECPAVTVDTT | SSSSLVALHW                       |
| ActnS3KS5      | AMPQEYRVGAG---DNVDGFRLTGNTSSVVSGRLAYFLGLVGPATVDTA   | CSSSLVSLHL                       |
| TetrAKS0       | AMDRGYCAQASAVPRAWESMLITGASASAIISGRIAYTYGLECPALTVDTA | SSSSLVALHL                       |
| PimS0KS0       | AMDRGYGTSASAAPSAWESMLITGASAVSGRIAYTYGLECPALTVDTA    | SSSSLVALHL                       |
| ActnS4KS12     | TDGQDYASLVFNSVADSEGHACTGIAASAIAGRLAYTFGLECPAVTVDTA  | CSSSLVALHL                       |
| ActnS1KS2-4-11 | TNGQDYAYLVVRSAAESTGEVGTGIAASAMSGRLAYTLGLECPAVTVDTA  | CSSSLVALHS                       |
| ActnS3KS9      | TNGQDYLSVLRTAAEDVRCHAATGVTASVLSGRVSYALGLECPAVTVDTA  | CSSSLVALHW                       |
| ActnS3KS10     | GISGDYRPSADGR-----DWQTAQSASLLSGRLAYTFGLECPVSDTA     | CSSSLVAVHL                       |
| ActnS3KS7      | SSFQDYAAAR---VDDLEPHVVTGSIPSVLSGRLAYVFLGLECPAVTVDTA | CSSSLVAMHL                       |
| ActnS3KS8      | ASYQDYTASVSRTAESABGHMITGSLGSILSGRVAYLLGLECPAVTLDTA  | CSSSLVALHL                       |
| ActnS0KS1      | TFGGCYGSLDGR-GDARCFIMTGTTPSVLSGRLSYVLGLVGPALTVDTA   | CSSSLVALHL                       |
| ActnS2KS3      | VMYQDYADLLC-D-AEYEGFRISGSSASVASGRVAYSLGFEGPAVTVDTA  | CSSSLVSLHL                       |
| ActnS3KS6      | VMYSDYANALC-G-GEFEGHQGTGTSASVVSGRVSYTLGLECPAVTVDTA  | CSSSLVAMHL                       |
|                | *                                                   | :. . :*::* *: **: :*:*:*. :*:*:* |

**Figure S5.** Partial amino acid sequence comparison for the KS domains.

The KS domains of the loading module of amphotericin, pimaricin, tetramycin, nystatin PKS all contain a serine instead of a cysteine in the active site as indicated by the cross region of the red and blue boxes. Abbreviations: Nys: Nystatin; Amph: Amphotericin; Pim: pimaricin; Tetr: tetramycin.





EQPWLAEHVWGCRTLVF  
THPWLADHTVACRVLF  
AQPWLAVYEADGRTLVF  
THPWLTDHAIGNVFFF  
AYPWLTDHTMGGSVLF  
AQPWLADHTVGRGTVLF  
AQPWLADHTAFGQVLLF  
EQPWLADHVVAGRVLFF  
TLPWLADHVISGRVLFF  
THPWLADHVVAGGVALF  
RLSYLSEHRHVGEAVLF  
RLPWLGEHRAQGEVFFF

\*: \* \* \*

## WPP motif

|           |       |
|-----------|-------|
| YAFHPVLL  | DAVAG |
| HGLHPALL  | DAARR |
| FALHPALL  | DTAVR |
| GGLHPALL  | DAVLQ |
| GGLHPVLL  | DAVLQ |
| FGVHPALL  | DAALH |
| FTLHPALL  | DAALH |
| GGLHPALL  | DAAVQ |
| LG IHPALL | DAVLH |
| FGAHPALL  | DSVVQ |
| YRIHPALL  | DACFQ |
| YQLHPVLL  | DACVQ |
| **. **:   | :     |

## LPFXW motifs

6

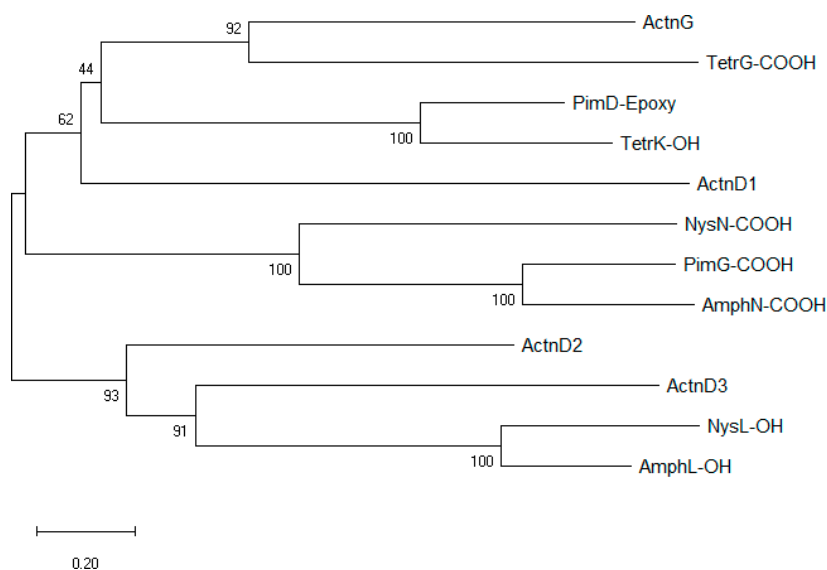

**Figure S8.** Phylogenetic analysis of the P450 by neighbor-Joining method.

Bootstrap values (expressed as percentage of 1000 replications) are shown at the branch points. Bar 0.2 substitutions per nucleotide position.

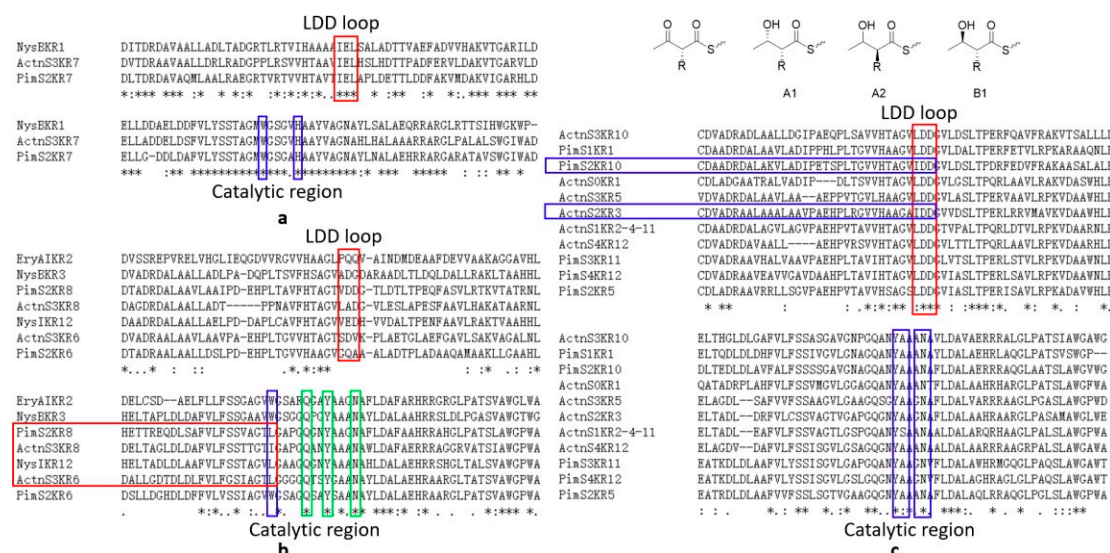

**Figure S9.** Partial sequence comparison for the KR domains.

Fingerprints featured for A1, A2, B1-type are highlighted by red and blue boxes [3].

Abbreviations: Ery: erythromycin.



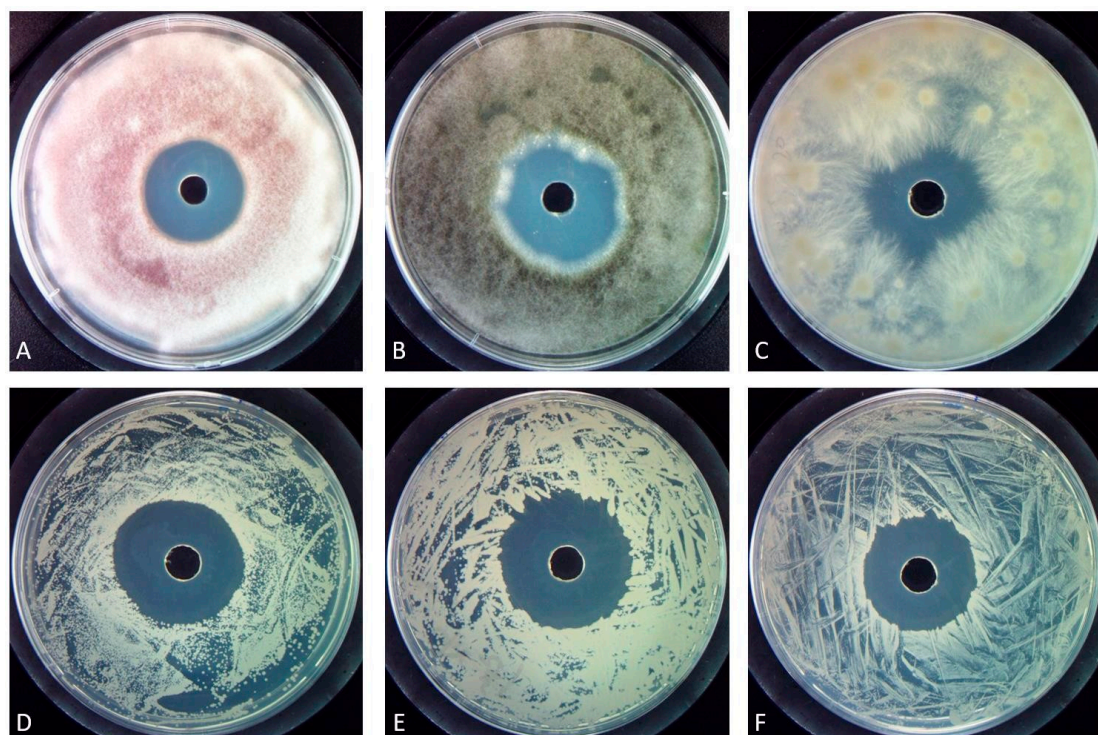

**Figure S10.** Antifungal activity of crude extracts from *A. spheciospongiae* against 6 pathogenic fungi.

(A) the conidial suspension of *Fusarium oxysporum*; (B) *Alternaria alternate*; (C) *Sclerotium rolfsi*; (D) the diluted broth suspension of *Candida albicans*; (E) *Cryptococcus neoformans*; (F) *Saccharomyces cerevisiae*.

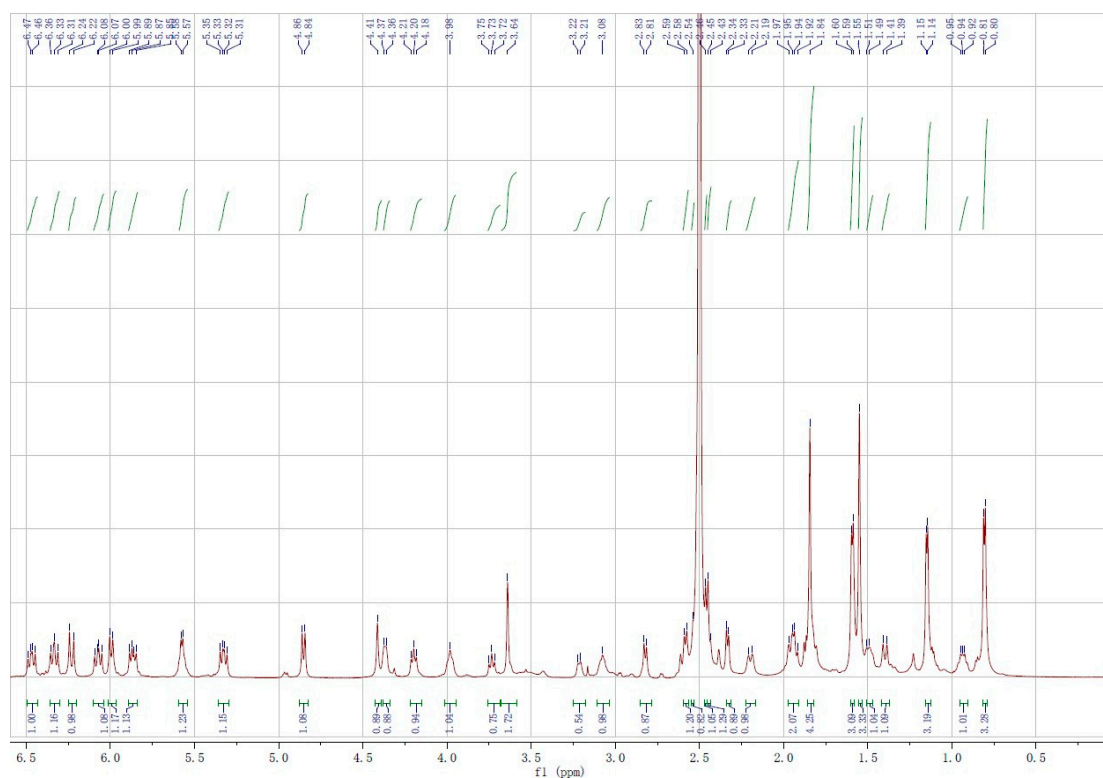

**Figure S11.**  $^1\text{H}$  spectrum of actinospene (**1**) in  $\text{DMSO-d}_6$ .



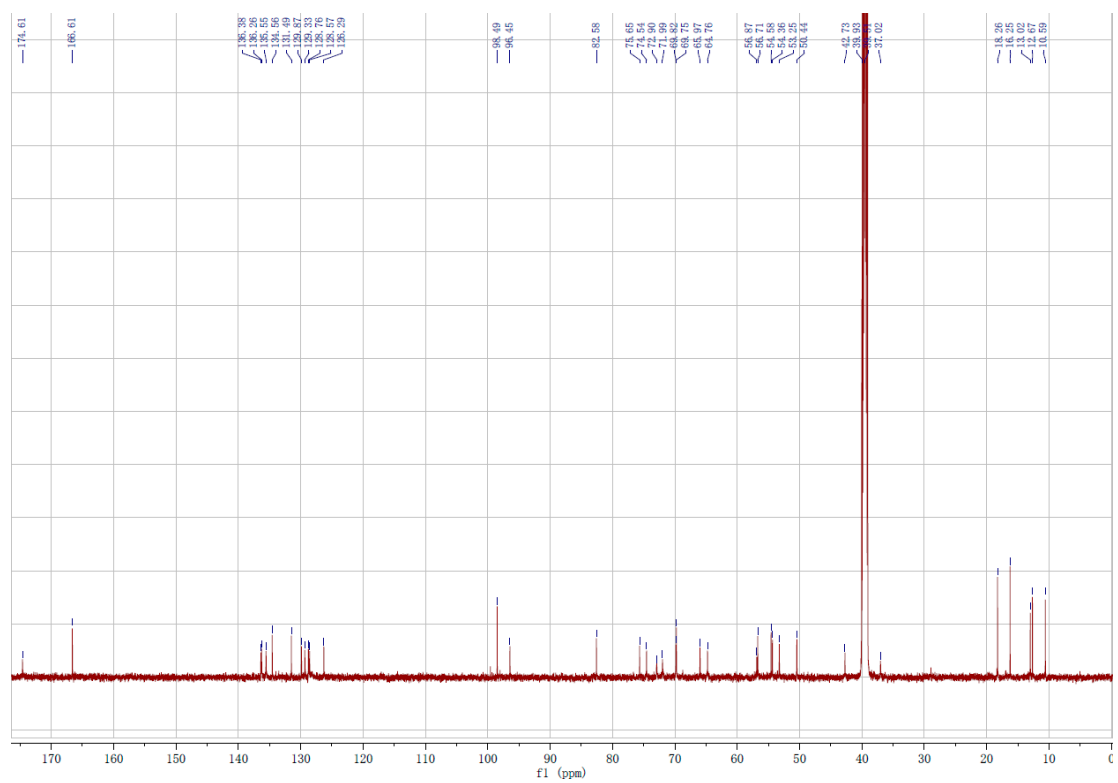

**Figure S12.**  $^{13}\text{C}$  spectrum of actinospene (**1**) in  $\text{DMSO-d}_6$ .

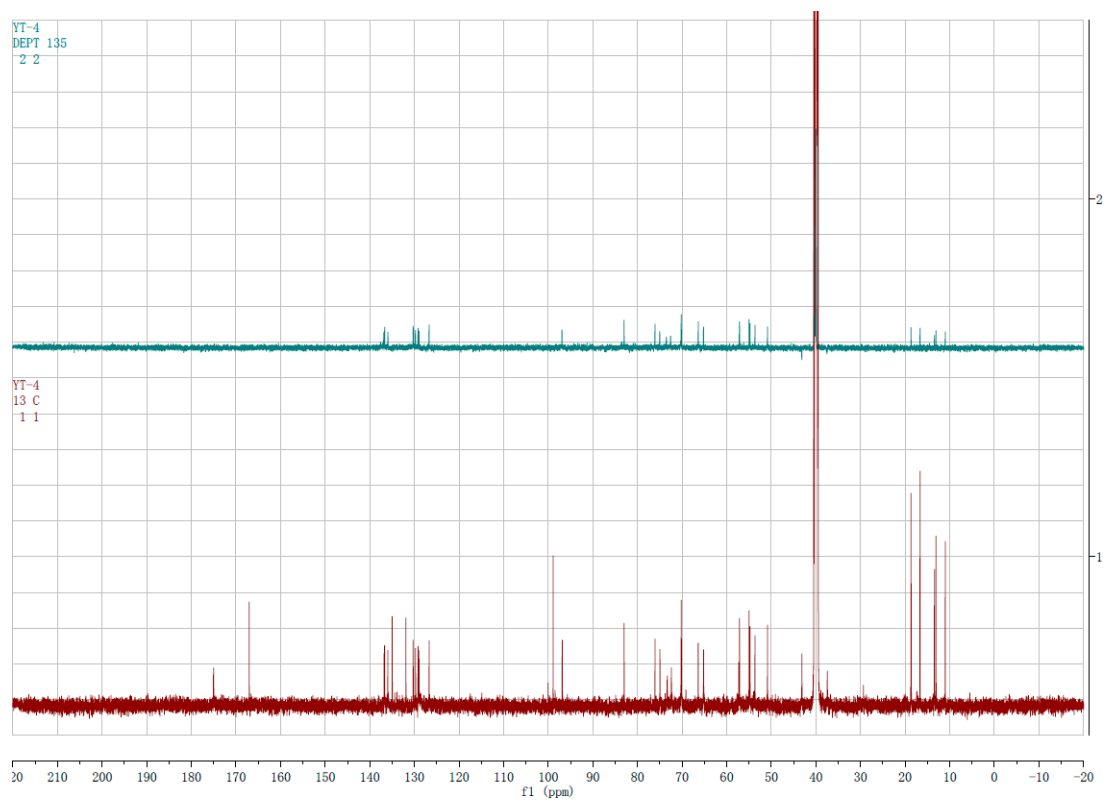

**Figure S13.** DEPT spectrum of actinospene (**1**) in  $\text{DMSO-d}_6$ .

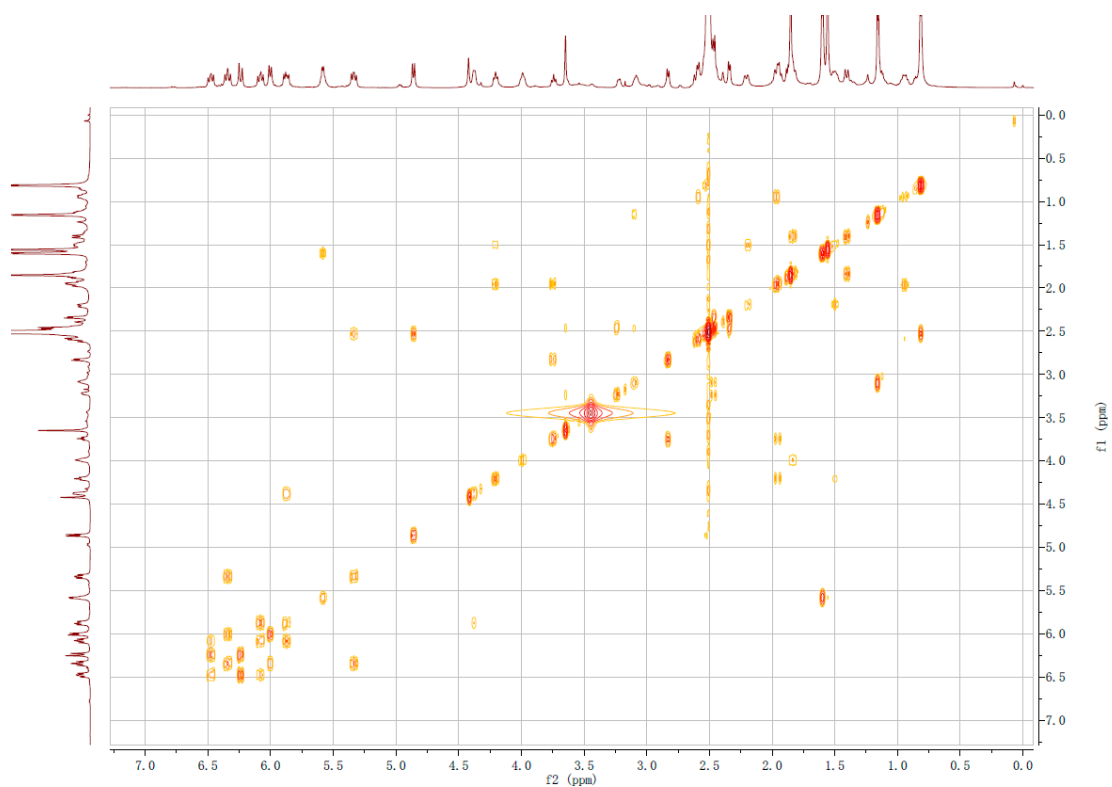

**Figure S14.**  $^1\text{H}$ - $^1\text{H}$  COSY spectrum of actinospene (**1**) in  $\text{DMSO-d}_6$ .

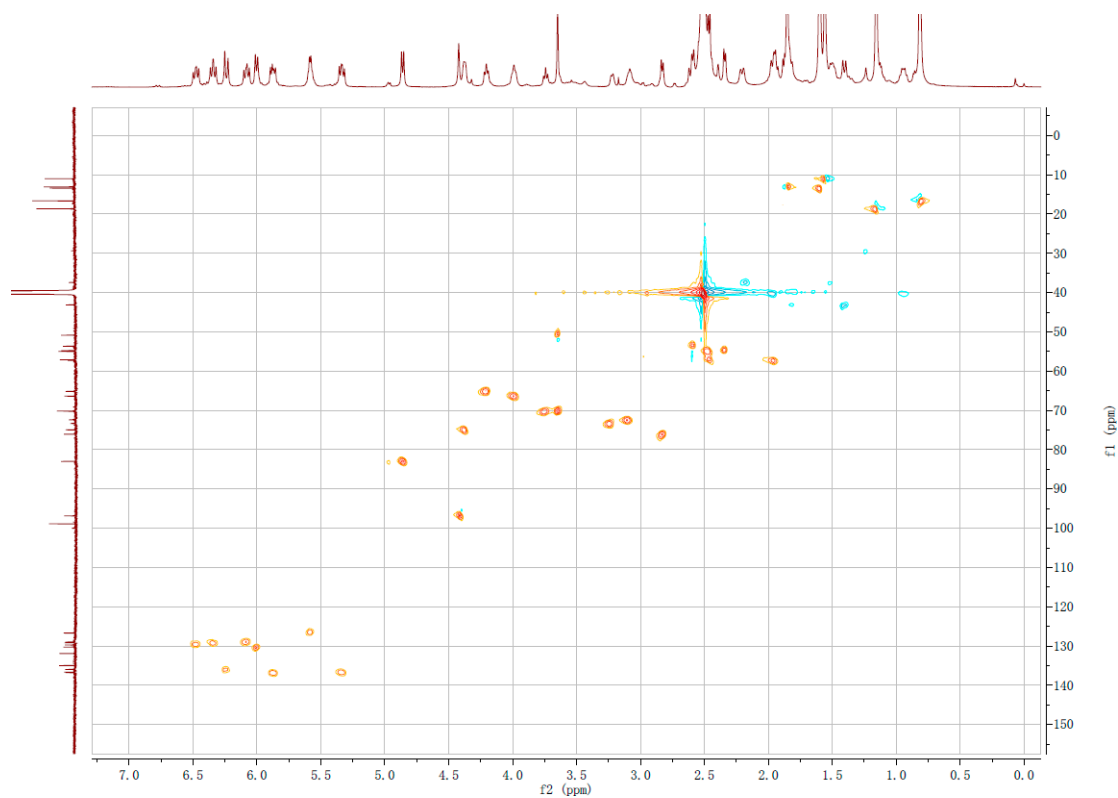

**Figure S15.** HSQC spectrum of actinospene (**1**) in  $\text{DMSO-d}_6$ .

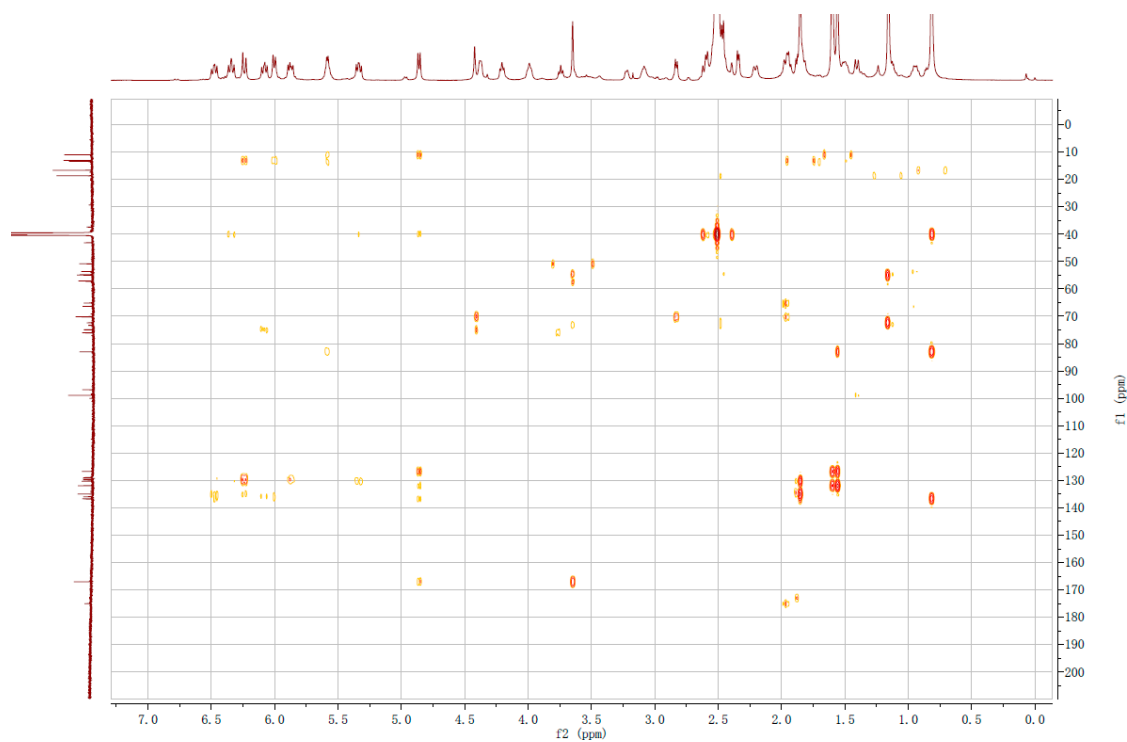

**Figure S16.** HMBC spectrum of actinospene (**1**) in DMSO-d<sub>6</sub>.

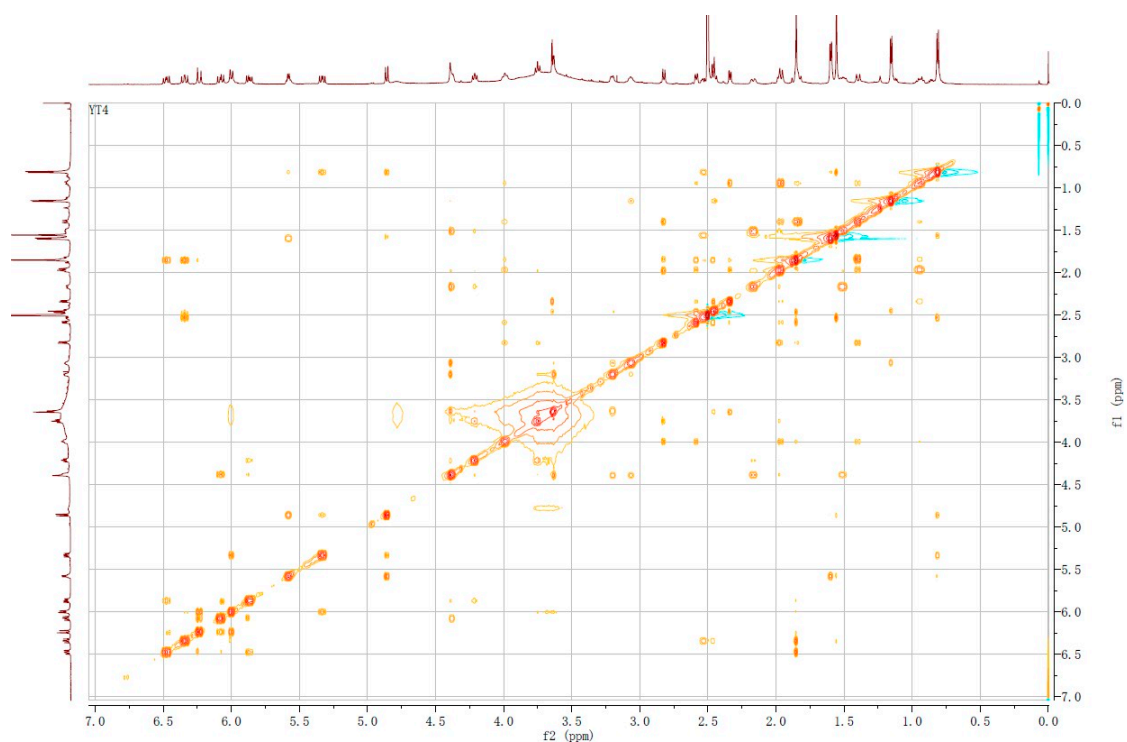

**Figure S17.** NOESY spectrum of actinospene (**1**) in DMSO-d<sub>6</sub>.

## References

- 1 Del Vecchio, F.; Petkovic, H.; Kendrew, S. G.; Low, L.; Wilkinson, B.; Lill, R.; Cortés, J.; Rudd, B. A.; Staunton, J.; Leadlay, P. F., Active-site residue, domain and module swaps in modular polyketide synthases. *Journal of industrial microbiology & biotechnology* **2003**, 30 (8), 489-494.

2. Keatinge-Clay, A., Crystal structure of the erythromycin polyketide synthase dehydratase. *Journal of molecular biology* **2008**, 384 (4), 941-953.
3. Keatinge-Clay, A. T., A tylosin ketoreductase reveals how chirality is determined in polyketides. *Chemistry & biology* **2007**, 14 (8), 898-908.
